# Supplementary material for: Organic-conjugated polyanthraquinonylimide cathodes for rechargeable magnesium batteries
Source: Royal Society of Chemistry journal article supplement (doi:10.1039/d2ta02795j), 2022-01-01
Supplement: d2ta02795j1.pdf [file d2ta02795j1.pdf]

## Electronic Supplementary Information

# Organic conjugated polyanthraquinonylimide cathodes for rechargeable magnesium batteries

Yiyuan Ding<sup>a</sup>, Dong Chen<sup>a</sup>, Xin Ren<sup>a</sup>, Yuliang Cao<sup>b</sup> and Fei Xu<sup>\*a</sup>

<sup>a</sup> Key Laboratory of Hydraulic Machinery Transients, Ministry of Education, School of Power and Mechanical Engineering, Wuhan University, Wuhan 430072, China.

<sup>b</sup> Hubei Key Lab of Electrochemical Power Sources, College of Chemistry & Molecular Science, Wuhan University, Wuhan 430072, China

\* E-mail:

Fei Xu (xufei2058@whu.edu.cn)

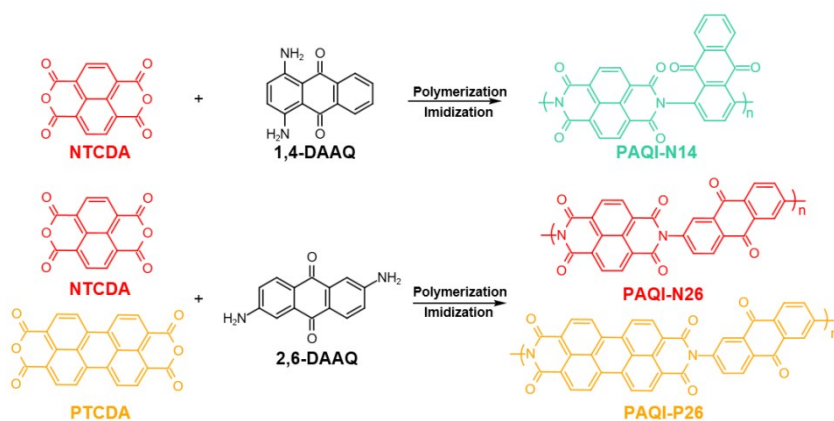

**Fig. S1** Synthesis of PAQIs.

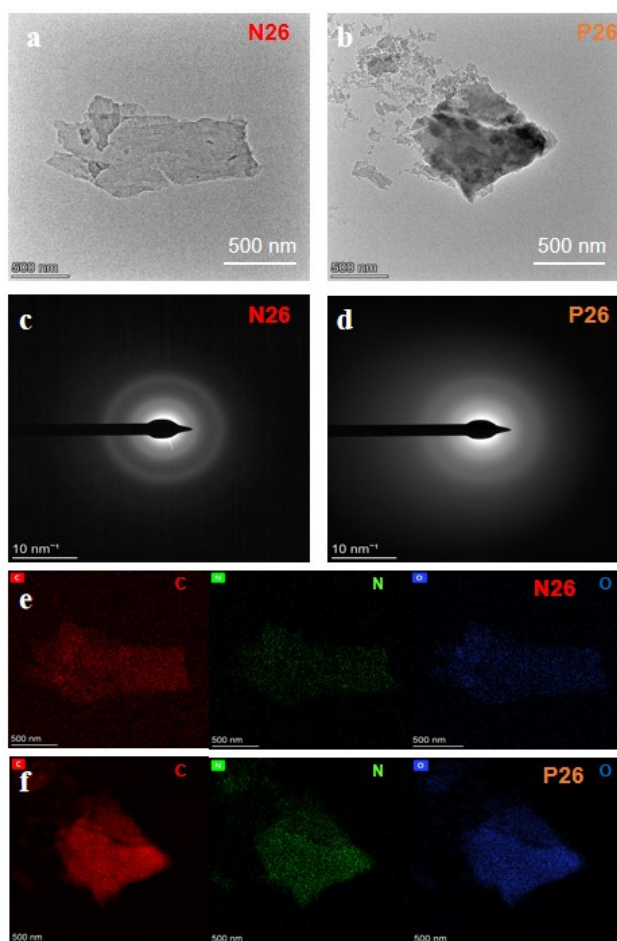

**Fig. S2** TEM images of (a) N26 and (b) P26. ED patterns of (c) N26 and (d) P26. EDS images of (e) N26 and (f) P26.

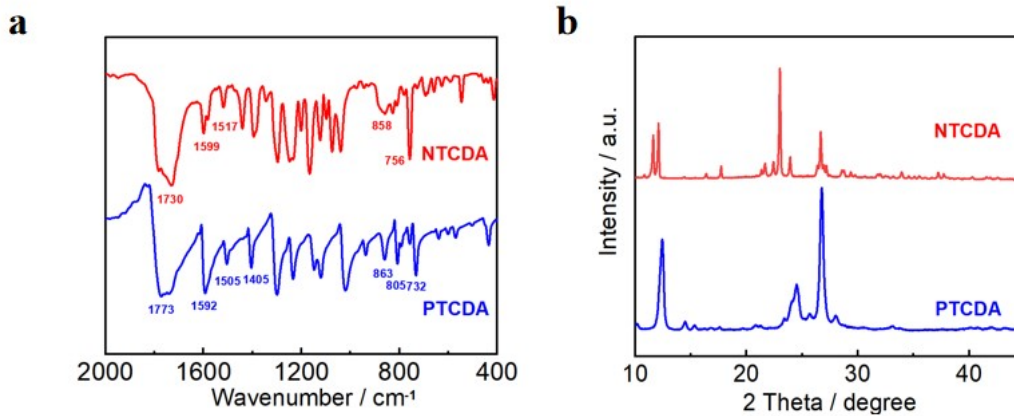

**Fig. S3** (a) IR spectra and (b) XRD patterns of NTCDA and PTCDA.

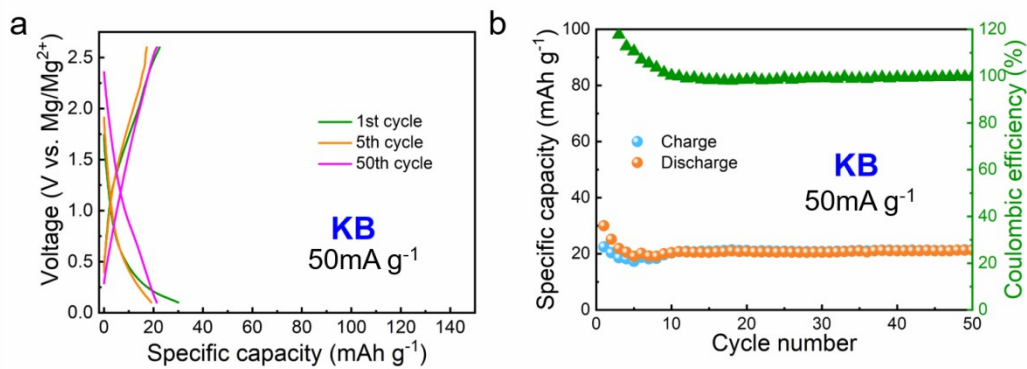

**Fig. S4** (a) Charge/discharge curves and (b) cycling performance of KB solely. The mass of KB was the same as that contained in the PAQI cathodes, and the mass of the active material was set the same as the PAQI electrode for a comparison.

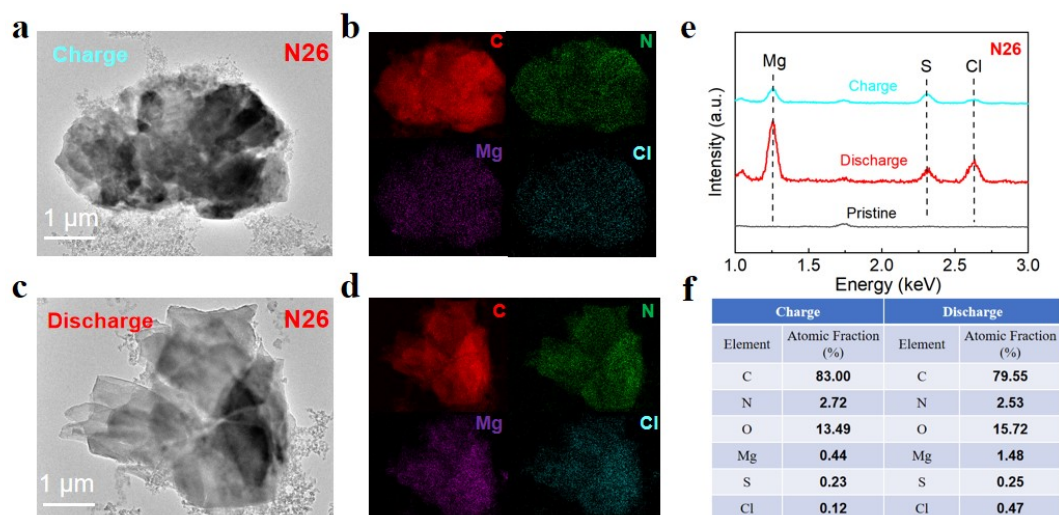

**Fig. S5** (a) STEM and (b) EDS images of N26 at charge state (20th cycle). (c) STEM and (d) EDS images of N26 at discharge state (20th cycle). (e) EDS spectra of N26 at pristine/charge/discharge states. (f) Relative atomic fractions of N26 at charge/discharge states.

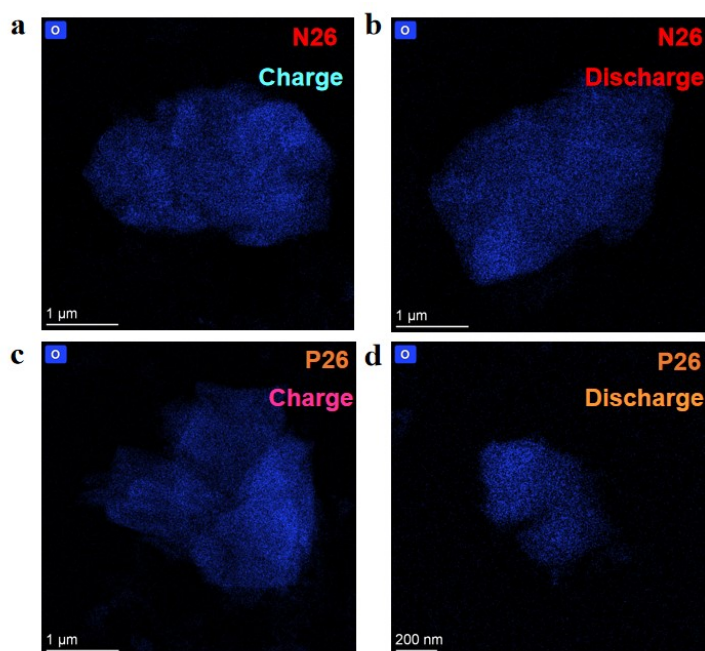

**Fig. S6** EDS O images for (a) charge and (b) discharge state of N26 (20th cycle). EDS O images for (c) charge and (d) discharge state of P26 (20th cycle).

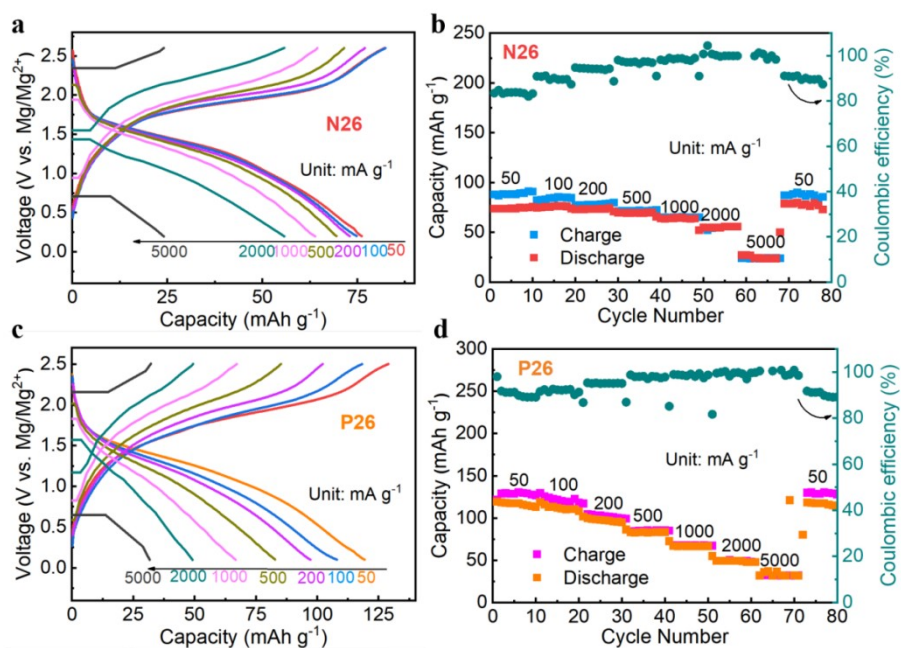

**Fig. S7** (a) Charge/discharge curves and (b) cycling performance of N26, (c) charge/discharge curves and (d) cycling performance of P26 at different current densities (0.1–2.6 V) with chlorine-free electrolyte of  $\text{Mg}(\text{TFSI})_2$  (0.5 M) dissolved in a mixed solvent of DME and 1-methoxy-2-propylamine (w/w=3.84/1).

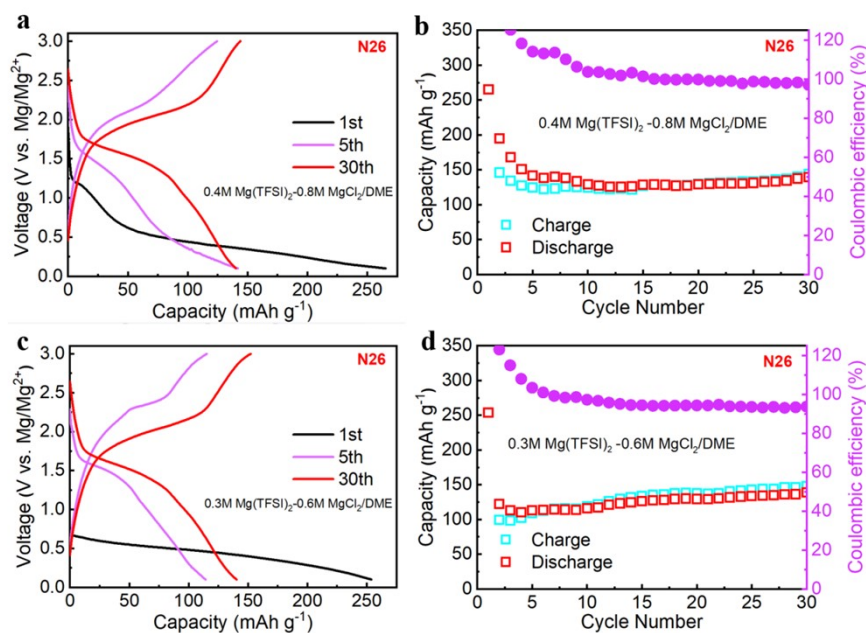

**Fig. S8** (a) Charge/discharge curves and (b) cycling performance of N26 in electrolyte of  $\text{Mg}(\text{TFSI})_2$  (0.4 M)- $\text{MgCl}_2$  (0.8 M)/DME at  $50 \text{ mA g}^{-1}$ . (c) Charge/discharge curves and (d) cycling performance of N26 in electrolyte of  $\text{Mg}(\text{TFSI})_2$  (0.3 M)- $\text{MgCl}_2$  (0.6 M)/DME at  $50 \text{ mA g}^{-1}$ .

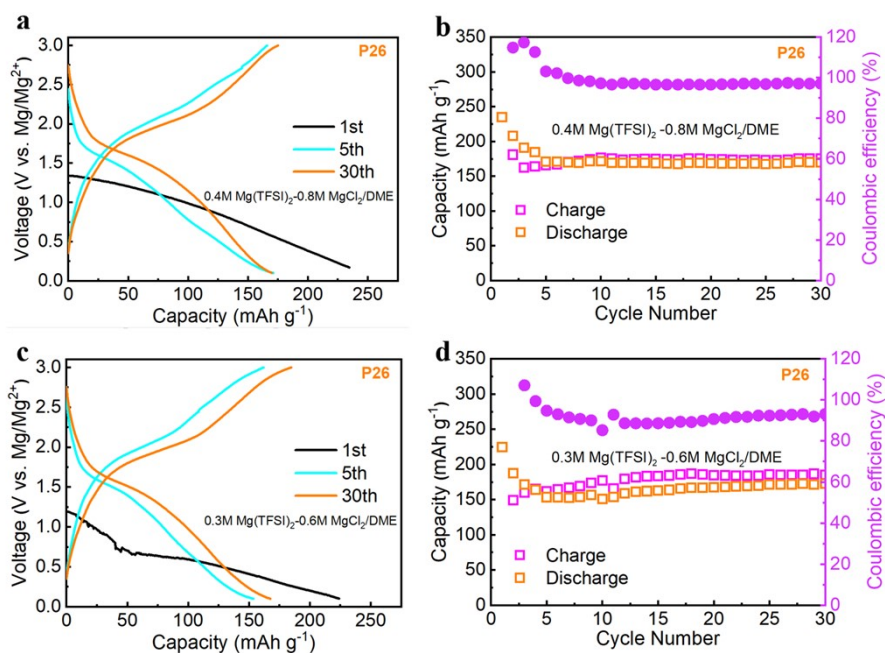

**Fig. S9** (a) Charge/discharge curves and (b) cycling performance of P26 in electrolyte of  $\text{Mg}(\text{TFSI})_2$  (0.4 M)- $\text{MgCl}_2$  (0.8 M)/DME at  $50 \text{ mA g}^{-1}$ . (c) Charge/discharge curves and (d) cycling performance of P26 in electrolyte of  $\text{Mg}(\text{TFSI})_2$  (0.3 M)- $\text{MgCl}_2$  (0.6 M)/DME at  $50 \text{ mA g}^{-1}$ .

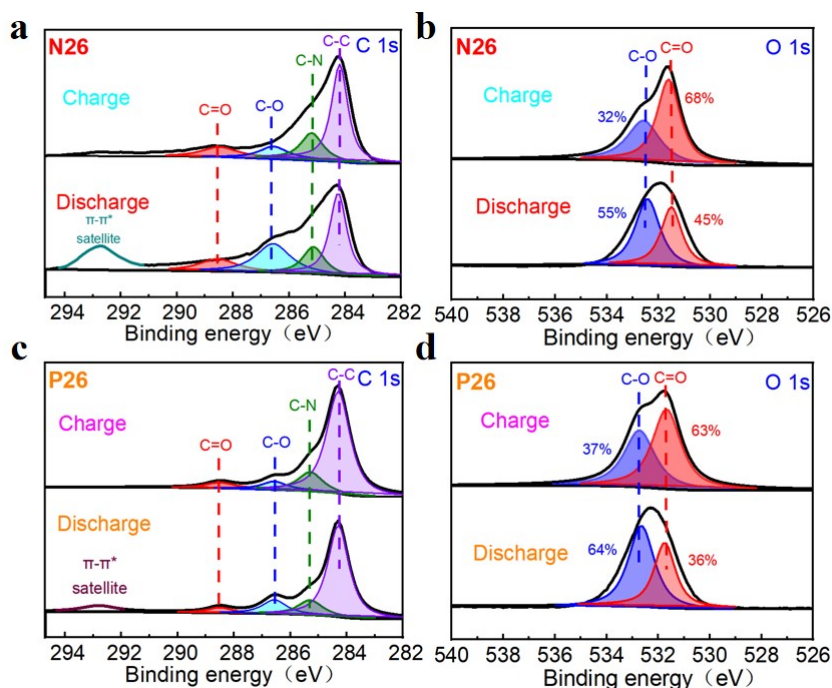

**Fig. S10** (a) Ex-situ C 1s and (b) O 1s XPS spectra of N26, and (c) ex-situ C 1s and (d) O 1s XPS spectra of P26 in chlorine-free electrolyte of  $\text{Mg}(\text{TFSI})_2$  (0.5 M) dissolved in a mixed solvent of DME and 1-methoxy-2-propylamine (w/w=3.84/1). The electrodes were cycled between 0.1 and 2.6 V. The electrodes at the 10th cycle were used.

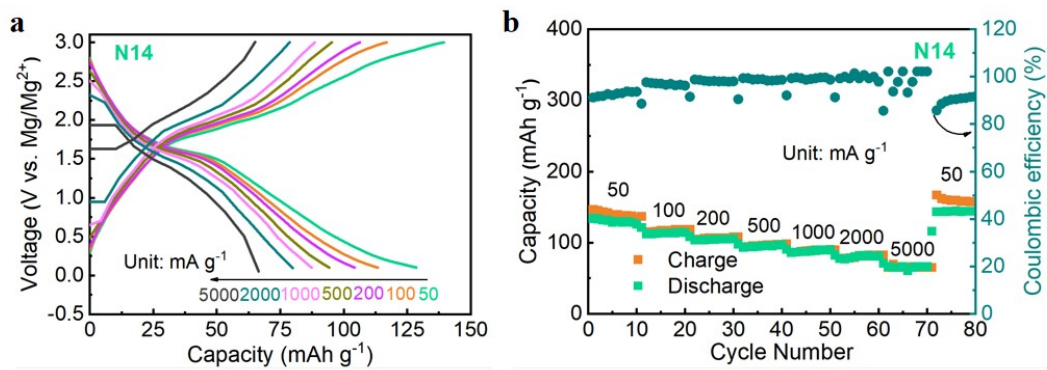

**Fig. S11** (a) Charge/discharge curves and (b) rate performance of N14 in the chlorine-containing electrolyte.

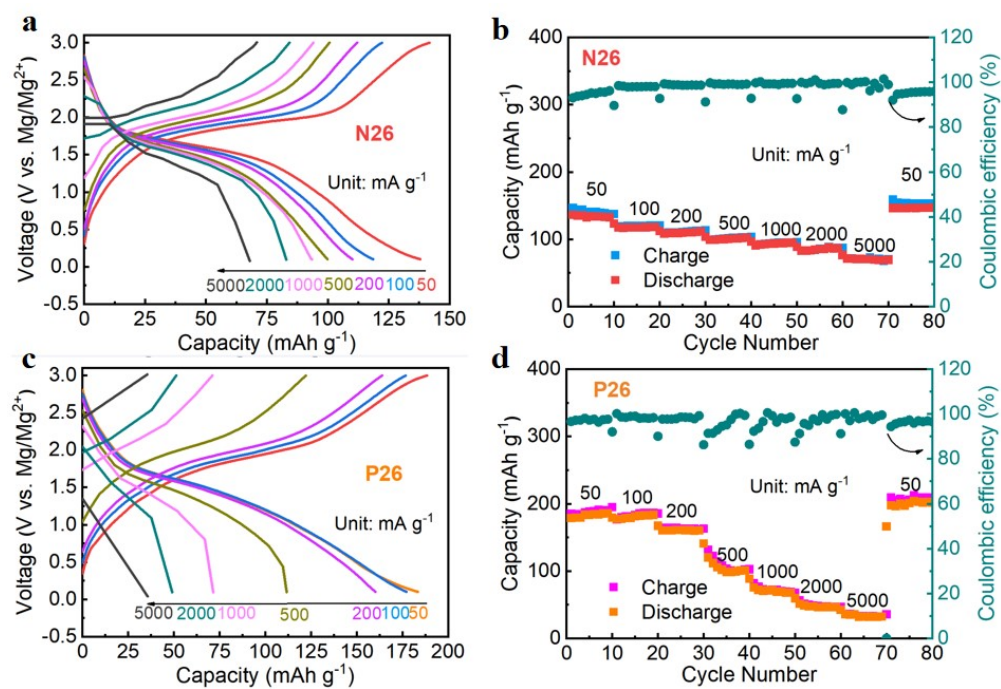

**Fig. S12** (a) Charge/discharge curves and (b) rate performance of N26, (c) charge/discharge curves and (d) cycling performance of P26 at different current densities in the chlorine-containing electrolyte.

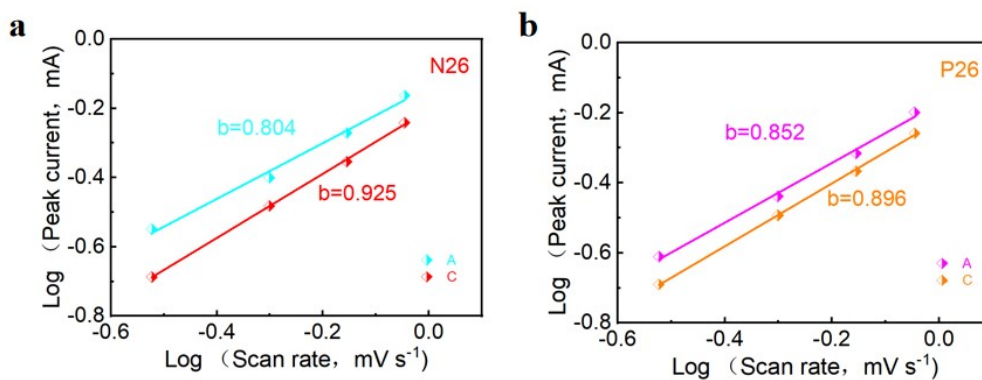

**Fig. S13** log(i) vs.  $-\log(v)$  plots for the redox peaks of (a) N26 and (b) P26.

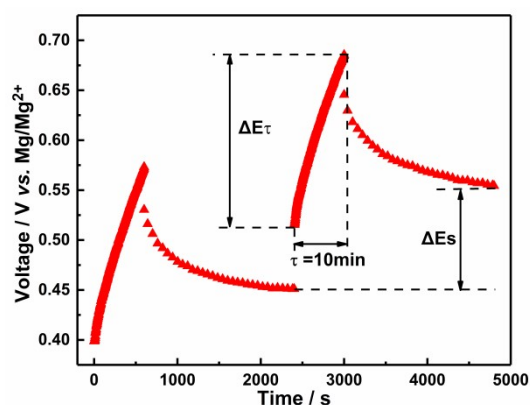

**Fig. S14** Calculation details of GITT.

The  $\text{Mg}^{2+}$  diffusivity can be calculated via the following formula:

$$D^{GITT} = \frac{4}{\pi\tau} \left( \frac{m_B V_M}{M_B S} \right)^2 \left( \frac{\Delta E_S}{\Delta E_\tau} \right)^2$$

Where  $\tau$  refers to constant current pulse time,  $m_B$  and  $M_B$  are the mass, molar mass of the cathode material, respectively.  $V_m$  is the molar volume of the compound and  $S$  is the area of electrode-electrolyte interface.  $\Delta E_S$  is voltage difference during a single-step experiment, and  $\Delta E_\tau$  is the total change of cell voltage during a constant current pulse.



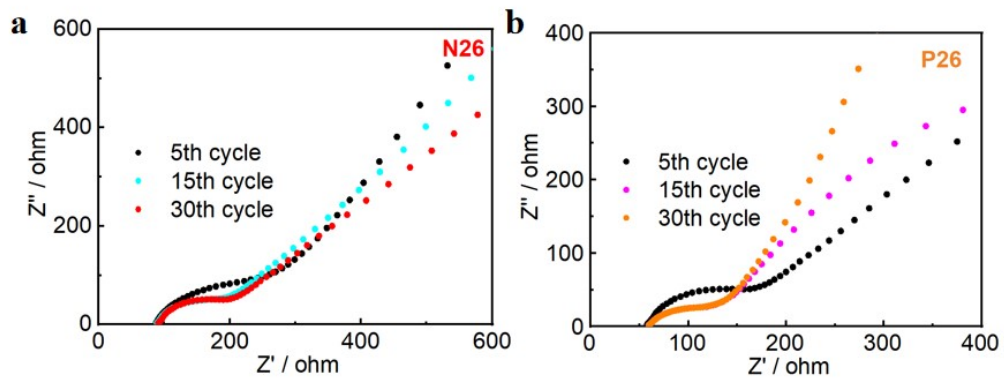

**Fig. S15** Electrochemical impedance spectra (EIS) of N26(a) and P26(b) electrodes at different cycles.

Table S1 Computation results

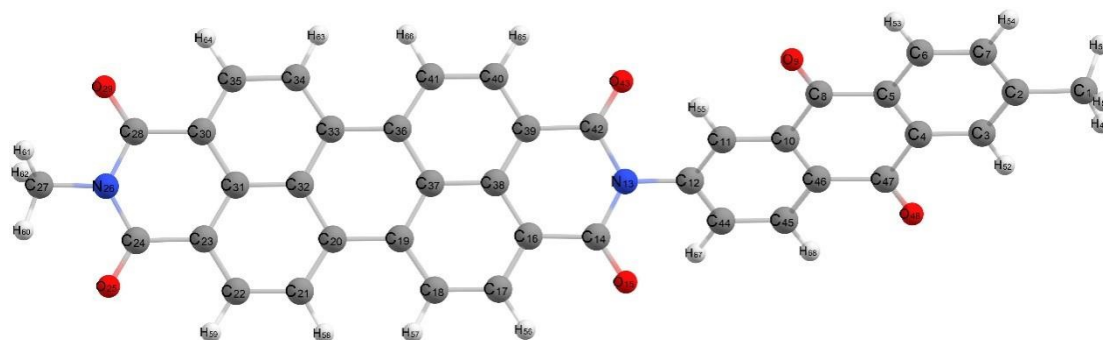

| Atom  | Pristine    | Discharged | Variation |
|-------|-------------|------------|-----------|
| 1(C)  | -0.07543973 | -0.1096145 | -0.03417  |
| 2(C)  | 0.01966735  | -0.0773481 | -0.09702  |
| 3(C)  | -0.03030071 | -0.0808679 | -0.05057  |
| 4(C)  | -0.01698273 | -0.0897151 | -0.07273  |
| 5(C)  | -0.0209518  | -0.0877938 | -0.06684  |
| 6(C)  | -0.02306288 | -0.0746217 | -0.05156  |
| 7(C)  | -0.02891419 | -0.1441371 | -0.11522  |
| 8(C)  | 0.1554729   | 0.04066678 | -0.11481  |
| 9(O)  | -0.22954959 | -0.4344722 | -0.20492  |
| 10(C) | -0.01318038 | -0.0626536 | -0.04947  |
| 11(C) | -0.02161011 | -0.0544052 | -0.0328   |
| 12(C) | 0.05155272  | -0.0043392 | -0.05589  |
| 13(N) | -0.03898309 | -0.0438552 | -0.00487  |
| 14(C) | 0.18494121  | 0.15107532 | -0.03387  |
| 15(O) | -0.25576375 | -0.3288077 | -0.07304  |
| 16(C) | -0.02211017 | -0.0802506 | -0.05814  |
| 17(C) | -0.01038368 | -0.0645602 | -0.05418  |
| 18(C) | -0.02765687 | -0.1080069 | -0.08035  |
| 19(C) | 0.01092653  | -0.0290819 | -0.04001  |
| 20(C) | 0.00891847  | -0.0485259 | -0.05744  |
| 21(C) | -0.02692885 | -0.0982571 | -0.07133  |
| 22(C) | -0.01154882 | -0.0904926 | -0.07894  |
| 23(C) | -0.01990395 | -0.0966925 | -0.07679  |
| 24(C) | 0.18362934  | 0.12589362 | -0.05774  |
| 25(O) | -0.26260758 | -0.3800031 | -0.1174   |
| 26(N) | -0.03589264 | -0.050496  | -0.0146   |
| 27(C) | -0.02784118 | -0.048355  | -0.02051  |
| 28(C) | 0.18134666  | 0.12523638 | -0.05611  |
| 29(O) | -0.26386081 | -0.3806505 | -0.11679  |
| 30(C) | -0.0199705  | -0.0961631 | -0.07619  |
| 31(C) | -0.00207967 | -0.0167371 | -0.01466  |
| 32(C) | 0.00036148  | -0.0129961 | -0.01336  |

|       |             |            |          |
|-------|-------------|------------|----------|
| 33(C) | 0.00884774  | -0.04786   | -0.05671 |
| 34(C) | -0.02682782 | -0.0974118 | -0.07058 |
| 35(C) | -0.01148378 | -0.0899698 | -0.07849 |
| 36(C) | 0.0108551   | -0.0284007 | -0.03926 |
| 37(C) | 0.00067235  | -0.0102071 | -0.01088 |
| 38(C) | -0.00123407 | -0.0148555 | -0.01362 |
| 39(C) | -0.02182749 | -0.0783224 | -0.05649 |
| 40(C) | -0.00975366 | -0.0618324 | -0.05208 |
| 41(C) | -0.02729338 | -0.1064381 | -0.07914 |
| 42(C) | 0.18554295  | 0.15344994 | -0.03209 |
| 43(O) | -0.25260572 | -0.3187577 | -0.06615 |
| 44(C) | -0.02128673 | -0.0959353 | -0.07465 |
| 45(C) | -0.01884967 | -0.0755392 | -0.05669 |
| 46(C) | -0.01463145 | -0.0693071 | -0.05468 |
| 47(C) | 0.1557727   | 0.02580665 | -0.12997 |
| 48(O) | -0.2293476  | -0.4585846 | -0.22924 |
| 49(H) | 0.03984136  | 0.00545353 | -0.03439 |
| 50(H) | 0.04035259  | -0.0105681 | -0.05092 |
| 51(H) | 0.04061003  | -0.0107913 | -0.0514  |
| 52(H) | 0.04534612  | 0.00057334 | -0.04477 |
| 53(H) | 0.04967201  | 0.00554119 | -0.04413 |
| 54(H) | 0.04575818  | -0.0276706 | -0.07343 |
| 55(H) | 0.05100093  | 0.02230754 | -0.02869 |
| 56(H) | 0.05671947  | 0.01870334 | -0.03802 |
| 57(H) | 0.04799661  | 0.00501205 | -0.04298 |
| 58(H) | 0.04772002  | 0.00817139 | -0.03955 |
| 59(H) | 0.05617836  | 0.0068468  | -0.04933 |
| 60(H) | 0.04381048  | 0.01937304 | -0.02444 |
| 61(H) | 0.04234162  | 0.01521812 | -0.02712 |
| 62(H) | 0.04231655  | 0.01495834 | -0.02736 |
| 63(H) | 0.0478226   | 0.00891999 | -0.0389  |
| 64(H) | 0.05643963  | 0.00733874 | -0.0491  |
| 65(H) | 0.05729343  | 0.02142087 | -0.03587 |
| 66(H) | 0.04813346  | 0.00596614 | -0.04217 |
| 67(H) | 0.05072452  | 0.00303264 | -0.04769 |
| 68(H) | 0.05207954  | 0.00538587 | -0.04669 |

**Table S2** EDS element analysis for charged state (3.0V) of the N26 cathode.

| Element | Family | Atomic Fraction (%) | Atomic Error (%) | Mass Fraction (%) | Mass Error (%) | Fit error (%) |
|---------|--------|---------------------|------------------|-------------------|----------------|---------------|
| C       | K      | 85.30               | 5.09             | 80.80             | 3.16           | 1.89          |
| N       | K      | 1.71                | 0.36             | 1.89              | 0.39           | 2.68          |
| O       | K      | 12.03               | 2.50             | 15.18             | 3.08           | 0.28          |
| Mg      | K      | 0.50                | 0.10             | 0.97              | 0.19           | 1.57          |
| S       | K      | 0.32                | 0.06             | 0.80              | 0.15           | 0.38          |
| Cl      | K      | 0.13                | 0.03             | 0.37              | 0.07           | 1.22          |

**Table S3** EDS element analysis for charged state (3.0V) of the P26 cathode.

| Element | Family | Atomic Fraction (%) | Atomic Error (%) | Mass Fraction (%) | Mass Error (%) | Fit error (%) |
|---------|--------|---------------------|------------------|-------------------|----------------|---------------|
| C       | K      | 87.19               | 3.96             | 83.40             | 2.34           | 0.03          |
| N       | K      | 1.37                | 0.29             | 1.53              | 0.32           | 3.84          |
| O       | K      | 10.90               | 2.24             | 13.89             | 2.82           | 1.72          |
| Mg      | K      | 0.36                | 0.07             | 0.70              | 0.14           | 0.32          |
| S       | K      | 0.11                | 0.02             | 0.28              | 0.05           | 0.78          |
| Cl      | K      | 0.07                | 0.01             | 0.19              | 0.04           | 1.29          |

**Table S4** EDS element analysis for discharged state (0.1V) of the N26 cathode.

| Element | Family | Atomic Fraction (%) | Atomic Error (%) | Mass Fraction (%) | Mass Error (%) | Fit error (%) |
|---------|--------|---------------------|------------------|-------------------|----------------|---------------|
| C       | K      | 79.55               | 5.12             | 73.32             | 2.89           | 0.05          |
| N       | K      | 2.53                | 0.54             | 2.71              | 0.56           | 3.98          |
| O       | K      | 15.72               | 3.30             | 19.30             | 3.94           | 0.32          |
| Mg      | K      | 1.48                | 0.31             | 2.76              | 0.56           | 1.43          |
| S       | K      | 0.25                | 0.05             | 0.62              | 0.12           | 0.44          |
| Cl      | K      | 0.47                | 0.09             | 1.29              | 0.24           | 0.36          |

**Table S5** EDS element analysis for discharged state (0.1V) of the P26 cathode.

| Element | Family | Atomic Fraction (%) | Atomic Error (%) | Mass Fraction (%) | Mass Error (%) | Fit error (%) |
|---------|--------|---------------------|------------------|-------------------|----------------|---------------|
| C       | K      | 86.22               | 4.37             | 81.48             | 2.66           | 1.33          |
| N       | K      | 1.42                | 0.30             | 1.57              | 0.32           | 2.82          |
| O       | K      | 10.75               | 2.22             | 13.53             | 2.75           | 1.69          |
| Mg      | K      | 1.19                | 0.24             | 2.28              | 0.46           | 0.74          |
| S       | K      | 0.15                | 0.03             | 0.38              | 0.07           | 1.36          |
| Cl      | K      | 0.27                | 0.05             | 0.76              | 0.14           | 0.97          |

**Table S6** Calculation details of specific power for different RMB cathodes.

Specific capacity, voltage, specific energy and specific power of state- of-the-art Mg batteries that store pure  $Mg^{2+}$ . Calculation of specific energy is based on the equation of  $E_s = E \times (C_c^{-1} + C_a^{-1})^{-1}$ , where  $C_a$  is the specific capacity of Mg metal anode (2205 mAh  $g^{-1}$ ), and  $C_c$  is cathode specific capacity. Calculation of specific power is based on the equation of  $P_s = E_s \times (C_c \times CD^{-1})^{-1}$ . CD is current density. The selected data is based on the maximum specific power of the material. The data of N26 and P26 are based on the rate performance of the cathodes in chlorine-containing electrolyte.

| Cathode Materials                      | CD/mA $g^{-1}$ | $C_c$ /mAh $g^{-1}$ | E/V  | $E_s$ /Wh $kg^{-1}$ | $P_s$ / W $kg^{-1}$ |
|----------------------------------------|----------------|---------------------|------|---------------------|---------------------|
| Mo <sub>6</sub> S <sub>8</sub> (R.T.)  | 258            | 56                  | 0.92 | 50                  | 231                 |
| Mo <sub>6</sub> S <sub>8</sub> (50 °C) | 258            | 94                  | 1.09 | 98                  | 270                 |
| Ti <sub>2</sub> S <sub>4</sub> (R.T.)  | 4.8            | 130                 | 1.1  | 135                 | 5                   |
| Ti <sub>2</sub> S <sub>4</sub> (60 °C) | 4.8            | 190                 | 1.15 | 201                 | 51                  |
| I <sub>2</sub>                         | 211            | 135                 | 1.8  | 229                 | 358                 |
| COFs                                   | 2280           | 39                  | 1.17 | 45                  | 2870                |
| P14AQ                                  | 450            | 112                 | 1.2  | 128                 | 897                 |
| PTO                                    | 20400          | 210                 | 1.63 | 313                 | 30361               |
| N26(this work)                         | 50             | 142                 | 1.67 | 222                 | 78                  |
|                                        | 2000           | 86                  | 1.45 | 119                 | 2780                |
| P26(this work)                         | 50             | 184                 | 1.53 | 258                 | 70                  |
|                                        | 2000           | 50                  | 1.25 | 62                  | 2431                |

**Table S7** Calculation of  $Mg^{2+}$  diffusion coefficients at 1.1 mV  $s^{-1}$ 

| peak | N26        |                                                           | P26        |                                                           |
|------|------------|-----------------------------------------------------------|------------|-----------------------------------------------------------|
|      | $i_p$ (mA) | $D$ ( $\times 10^{-10}$ cm <sup>2</sup> s <sup>-1</sup> ) | $i_p$ (mA) | $D$ ( $\times 10^{-10}$ cm <sup>2</sup> s <sup>-1</sup> ) |
| A    | 0.7721     | 1.40                                                      | 0.7459     | 1.37                                                      |
| C    | -0.7356    | 1.35                                                      | -0.6829    | 1.24                                                      |

The diffusion coefficient of  $Mg^{2+}$  is calculated by the following Randles-Sevcik Equation:

$$i_p = 2.69 \times 10^5 n^{3/2} A D^{1/2} \nu^{1/2} C_0$$

where  $i_p$  is the peak current (A),  $n$  is the number of electrons per molecule during the reaction,  $A$  is the contact area between the electrode and electrolyte,  $D$  is the diffusion coefficient of  $Mg^{2+}$  (cm<sup>2</sup> s<sup>-1</sup>),  $C_0$  is the concentration of  $Mg^{2+}$  ion in the electrode material, and  $\nu$  is the scan rate (V s<sup>-1</sup>).
